# Supplementary material
Source: publisher figshare collection journal article supplement (https://acs.figshare.com/ndownloader/files/4454944)
Supplement: Supplementary file 1 [file 4454944]

## Multilayer Buildup and Biofouling Characteristics of PSS-*b*-PEG Containing Films

Christina Cortez,<sup>1</sup> John F. Quinn,<sup>1</sup> Xiaojuan Hao,<sup>2,3</sup> Chakravarthy S. Gudipati,<sup>2</sup> Martina H. Stenzel,<sup>2</sup> Thomas P. Davis,<sup>2</sup> and Frank Caruso<sup>1,\*</sup>

<sup>1</sup> Centre for Nanoscience and Nanotechnology, Department of Chemical and Biomolecular Engineering, The University of Melbourne, Melbourne, Victoria 3010, Australia

<sup>2</sup> Centre for Advanced Macromolecular Design, University of New South Wales, Sydney, NSW 2052, Australia

<sup>3</sup> Current address: CSIRO Molecular and Health Technologies, Bayview Avenue, Clayton, Private Bag 10, Clayton South MDC, Victoria 3169, Australia

\*Corresponding author. Email: fcaruso@unimelb.edu.au

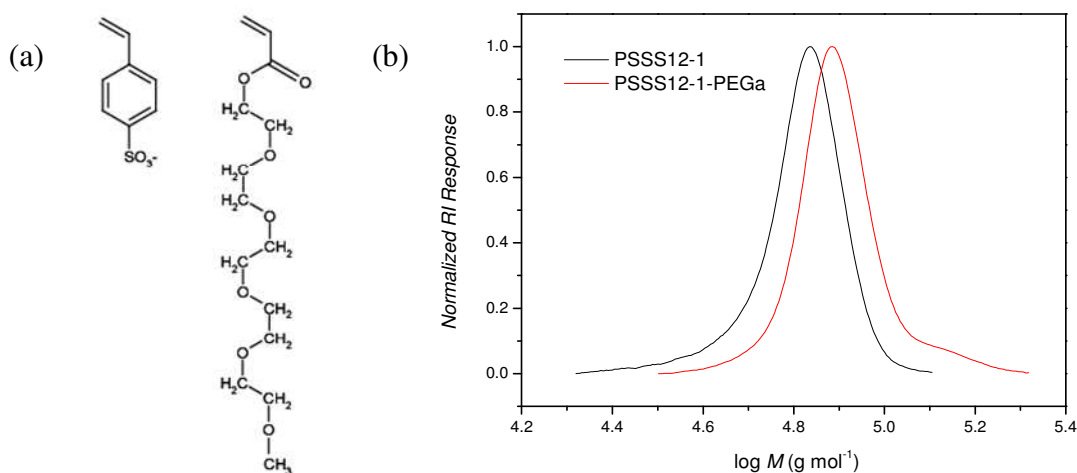

**Figure S1.** (a) Structures of styrene sulfonate (left) and PEG (right) monomers. (b) GPC trace of PSS macroRAFT agent (black line) and P(SS-*b*-PEG) block copolymer (red line). Increase in the molecular weight is indicative of successful chain extension with the second monomer.

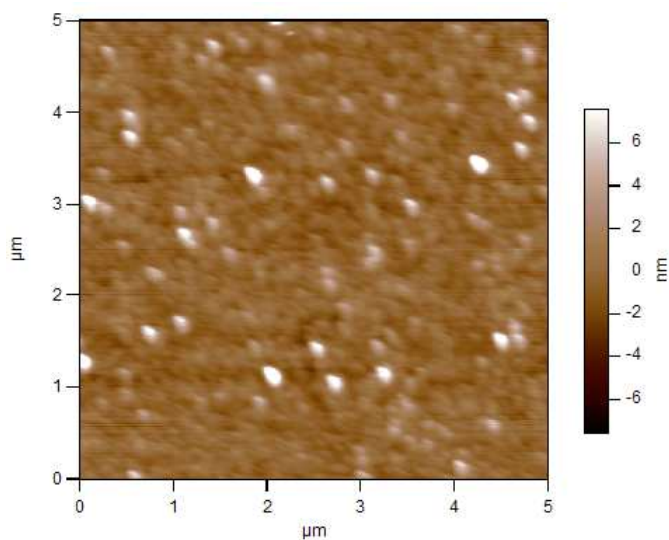

**Figure S2.** AFM image of a PEI-(PSS-*b*-PEG/PAH)<sub>10.5</sub> multilayer film.

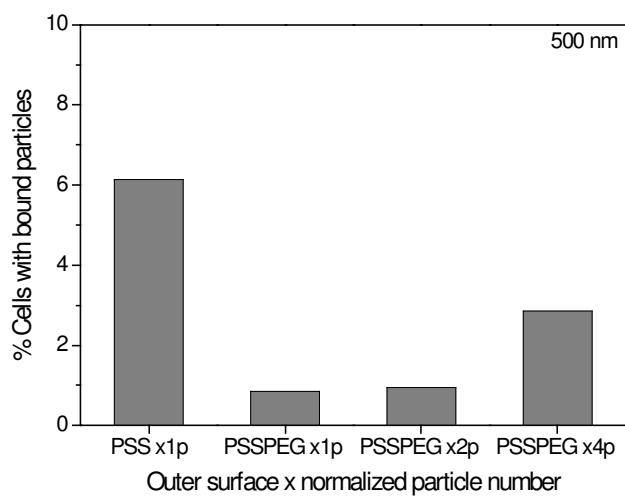

**Figure S3.** Flow cytometry data showing the binding of 500 nm fluorescently labeled PSS-*b*-PEG- or PSS-terminated particles to LIM1215 human colorectal cancer cells. Particle number of  $\times 1p$  represents 100 particles cell<sup>-1</sup>. The y axis shows the percentage of live cells with bound particles after 1 h incubation at 4 °C.
